# Supplementary material for: Investigating the Acute Metabolic Effects of the N-Methyl Carbamate Insecticide, Methomyl, on Mouse Liver
Source: MDPI journal article supplement (doi:10.3390/metabo13080901), 2023-08-01
Supplement: s1 [file s1]

# Investigating the Acute Metabolic Effects of the N-Methyl Carbamate Insecticide, Methomyl, on Mouse Liver

## Supplemental Materials

Amy M. Groswald<sup>1</sup>, Tyler C. Gripshover<sup>2</sup>, Walter H. Watson<sup>1, 3-5</sup>, Banrida Wahlang<sup>1-6</sup>, Jianzhu Luo<sup>1,3</sup>, Loretta L. Jophlin<sup>1,3-5</sup>, Matthew C. Cave<sup>1-8</sup>

- 1 Division of Gastroenterology, Hepatology, and Nutrition, Department of Medicine, School of Medicine, University of Louisville, Louisville, KY 40202, USA
- 2 Department of Pharmacology & Toxicology, School of Medicine, University of Louisville, Louisville, KY 40202, USA
- 3 The Hepatobiology and Toxicology Center, University of Louisville, Louisville, KY 40202, USA
- 4 The University of Louisville Alcohol Research Center, Louisville, KY 40202, USA
- 5 The Center for Integrative Environmental Health Sciences, Louisville, KY 40202, USA
- 6 The University of Louisville Superfund Research Center, Louisville, KY 40202, USA
- 7 Department of Biochemistry & Molecular Genetics, School of Medicine, University of Louisville, Louisville, KY 40202, USA
- 8 Robley Rex Veterans Affairs Medical Center, Louisville, KY, USA.

**Supplemental Table S1.** List of housekeeping gene and Taqman probes of interest for study.

| <b>Taqman probe names</b>                                                               | <b>Abbreviated name</b> | <b>Assay ID</b> |
|-----------------------------------------------------------------------------------------|-------------------------|-----------------|
| Glyceraldehyde-3-phosphate Dehydrogenase (Purchased separately from Applied Biosystems) | <i>Gapdh</i>            | Ref: 4351309    |
| Nuclear Factor, Erythroid Derived 2, like 2                                             | <i>Nrf2</i>             | Mm00477784      |
| Glutamate-Cysteine Ligase, Catalytic subunit                                            | <i>Gclc</i>             | Mm00802658      |
| Solute Carrier Family 7 Member 11                                                       | <i>Slc7a11</i>          | Mm00442530      |
| Phosphoenolpyruvate Carboxykinase 1                                                     | <i>Pck1</i>             | Mm01247058      |
| Cytochrome P450 family 1, subfamily a, member 2                                         | <i>Cyp1a2</i>           | Mm00487224      |
| Cytochrome P450 family 2, subfamily b, polypeptide 10                                   | <i>Cyp2b10</i>          | Mm01972453      |
| Cytochrome P450 family 3, subfamily a, polypeptide 11                                   | <i>Cyp3a11</i>          | Mm00731567      |

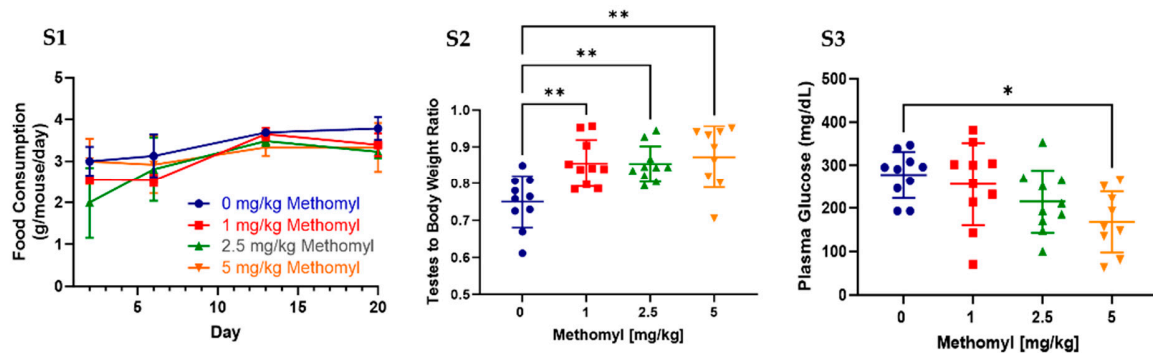

**Supplemental Figures S1-S3.** Food consumption was similar between all groups (S1). Testes to body weight ratio was increased by all Methomyl doses tested. (S2). Plasma glucose was decreased by Methomyl (5 mg/kg) (S3). \* $p < 0.05$ , \*\* $p < 0.01$ .
